# Supplementary material for: Efficacy and safety of ozanimod in multiple sclerosis: Dose-blinded extension of a randomized phase II study
Source: PubMed Central journal article supplement — Mult Scler. 2018 Jul 25;25(9):1255–62. doi: 10.1177/1352458518789884 (PMC6681431; doi:10.1177/1352458518789884), 2018-07-25
Supplement: MSJ789884_supplementary_appendix.pdf [file MSJ789884_supplementary_appendix.pdf]

## MS Journal Appendix for MRI methodology

| Hardware                          |                                                                                                                                                                                                                                                                                                                                                                                                                                                                                                                                                                                                                                                                                                                                                                                                                                                                                                                                                                                                                                         |
|-----------------------------------|-----------------------------------------------------------------------------------------------------------------------------------------------------------------------------------------------------------------------------------------------------------------------------------------------------------------------------------------------------------------------------------------------------------------------------------------------------------------------------------------------------------------------------------------------------------------------------------------------------------------------------------------------------------------------------------------------------------------------------------------------------------------------------------------------------------------------------------------------------------------------------------------------------------------------------------------------------------------------------------------------------------------------------------------|
| Field strength                    | 1T, 1.5T or 3.0T                                                                                                                                                                                                                                                                                                                                                                                                                                                                                                                                                                                                                                                                                                                                                                                                                                                                                                                                                                                                                        |
| Manufacturer                      | Siemens / GE / Philips / Toshiba / Picker                                                                                                                                                                                                                                                                                                                                                                                                                                                                                                                                                                                                                                                                                                                                                                                                                                                                                                                                                                                               |
| Model                             | <ul style="list-style-type: none"> <li>• Siemens               <ul style="list-style-type: none"> <li>○ Symphony 1.5T</li> <li>○ Espree 1.5T</li> <li>○ Essenza 1.5T</li> <li>○ Avanto 1.5T</li> <li>○ Verio 3T</li> <li>○ Spectra 3T</li> </ul> </li> <li>• GE:               <ul style="list-style-type: none"> <li>○ Horizon 1.5T</li> <li>○ Excite 1.5T</li> <li>○ Excite HD 1.5T</li> <li>○ HDe 1.5T</li> <li>○ HDxt 1.5T</li> <li>○ Optima MR360 1.5T</li> <li>○ Optima MR450w 1.5T</li> <li>○ Excite HD 3T</li> <li>○ HDxt 3T</li> </ul> </li> <li>• Philips:               <ul style="list-style-type: none"> <li>○ Intera 1T</li> <li>○ GyroscanNT 1.5T</li> <li>○ Intera 1.5T</li> <li>○ Achieva 1.5T</li> <li>○ Ingenia 1.5T</li> <li>○ Intera 3T</li> <li>○ Achieva 3T</li> <li>○ Ingenia 3T</li> </ul> </li> <li>• Toshiba:               <ul style="list-style-type: none"> <li>○ Excelart 1.5T</li> </ul> </li> <li>• Picker:               <ul style="list-style-type: none"> <li>○ Eclipse 1.5T</li> </ul> </li> </ul> |
| Coil type<br>(e.g. head, surface) | Quadrature or Multichannel (each scanner scanning with only one coil)                                                                                                                                                                                                                                                                                                                                                                                                                                                                                                                                                                                                                                                                                                                                                                                                                                                                                                                                                                   |
| Number of coil channels           | If multichannel: 4 to 24 (*)                                                                                                                                                                                                                                                                                                                                                                                                                                                                                                                                                                                                                                                                                                                                                                                                                                                                                                                                                                                                            |

| Acquisition sequence: PD-weighted                                                                   |                                               |    |
|-----------------------------------------------------------------------------------------------------|-----------------------------------------------|----|
| Type<br>(e.g. FLAIR, DIR, DTI, fMRI)                                                                | 2D Turbo Spin Echo<br>Proton Density weighted |    |
| Acquisition time                                                                                    | 3:03 to 5:30                                  |    |
| Orientation                                                                                         | Axial / Oblique                               |    |
| Alignment<br>(e.g. anterior commissure/poster<br>commissure line)                                   | AC-PC                                         |    |
| Voxel size                                                                                          | 0.98 mm x 0.98 mm x 3mm (slice thickness)     |    |
| TR                                                                                                  | 2050 ms to 3200 ms (*)                        |    |
| TE                                                                                                  | 8 to 15 ms (*)                                |    |
| TI                                                                                                  | -                                             |    |
| Flip angle                                                                                          | 111° to 180° (*)                              |    |
| NEX                                                                                                 | 1                                             |    |
| Field of view                                                                                       | AP: 250mm<br>RL: 187.5mm to 250mm (*)         |    |
| Matrix size                                                                                         | 256                                           |    |
| Parallel imaging                                                                                    | Yes                                           | No |
| If used, parallel imaging method:<br>(e.g. SENSE, GRAPPA)                                           | N/A                                           |    |
| Cardiac gating                                                                                      | Yes                                           | No |
| If used, cardiac gating method:<br>(e.g. PPU or ECG)                                                | N/A                                           |    |
| Contrast enhancement                                                                                | Yes                                           | No |
| If used, provide name of contrast agent,<br>dose and timing of scan post-contrast<br>administration | N/A                                           |    |

**Acquisition sequence: PD-weighted**

|                   |                                                                               |
|-------------------|-------------------------------------------------------------------------------|
| Other parameters: | Phase encoding direction: R/L<br>60 slices<br>Turbo factor (ETL) = 3 or 4 (*) |
|-------------------|-------------------------------------------------------------------------------|

**Acquisition sequence: T2 weighted**

|                                                                   |                                           |
|-------------------------------------------------------------------|-------------------------------------------|
| Type<br>(e.g. FLAIR, DIR, DTI, fMRI)                              | 2D Turbo Spin Echo<br>T2 weighted         |
| Acquisition time                                                  | 2:48 to 5:38                              |
| Orientation                                                       | Axial / Oblique                           |
| Alignment<br>(e.g. anterior commissure/posterior commissure line) | AC-PC                                     |
| Voxel size                                                        | 0.98 mm x 0.98 mm x 3mm (slice thickness) |
| TR                                                                | 3850 ms to 7301 ms (*)                    |
| TE                                                                | 60 ms to 91 ms (*)                        |
| TI                                                                | -                                         |
| Flip angle                                                        | 120° to 180° (*)                          |
| NEX                                                               | 1                                         |
| Field of view                                                     | AP: 250 mm<br>RL: 187.5 mm to 250 mm (*)  |
| Matrix size                                                       | 256                                       |

| Acquisition sequence: T2 weighted                                                                   |                                                                                |    |
|-----------------------------------------------------------------------------------------------------|--------------------------------------------------------------------------------|----|
| Parallel imaging                                                                                    | Yes                                                                            | No |
| If used, parallel imaging method:<br>(e.g. SENSE, GRAPPA)                                           |                                                                                |    |
| Cardiac gating                                                                                      | Yes                                                                            | No |
| If used, cardiac gating method:<br>(e.g. PPU or ECG)                                                |                                                                                |    |
| Contrast enhancement                                                                                | Yes                                                                            | No |
| If used, provide name of contrast agent,<br>dose and timing of scan post-contrast<br>administration |                                                                                |    |
| Other parameters:                                                                                   | Phase encoding direction: R/L<br>60 slices<br>Turbo factor (ETL) = 7 to 15 (*) |    |

**Acquisition sequence: T1 weighted pre contrast**

|                                                                                                     |                                                      |    |
|-----------------------------------------------------------------------------------------------------|------------------------------------------------------|----|
| Type<br>(e.g. FLAIR, DIR, DTI, fMRI)                                                                | 3D spoiled gradient echo<br>T1 weighted pre contrast |    |
| Acquisition time                                                                                    | 4:13 to 9:02                                         |    |
| Orientation                                                                                         | Axial / Oblique                                      |    |
| Alignment<br>(e.g. anterior commissure/poster<br>commissure line)                                   | AC-PC                                                |    |
| Voxel size                                                                                          | 0.98 mm x 0.98 mm x 3mm                              |    |
| TR                                                                                                  | 28 or 30 ms (*)                                      |    |
| TE                                                                                                  | 4 to 11 ms (*)                                       |    |
| TI                                                                                                  | -                                                    |    |
| Flip angle                                                                                          | 27° or 30° (*)                                       |    |
| NEX                                                                                                 | 1                                                    |    |
| Field of view                                                                                       | AP: 250mm<br>RL: 187.5 to 226.5mm (*)<br>SI: 180mm   |    |
| Matrix size                                                                                         | 256                                                  |    |
| Parallel imaging                                                                                    | Yes                                                  | No |
| If used, parallel imaging method:<br>(e.g. SENSE, GRAPPA)                                           | N/A                                                  |    |
| Cardiac gating                                                                                      | Yes                                                  | No |
| If used, cardiac gating method:<br>(e.g. PPU or ECG)                                                | N/A                                                  |    |
| Contrast enhancement                                                                                | Yes                                                  | No |
| If used, provide name of contrast agent,<br>dose and timing of scan post-contrast<br>administration | N/A                                                  |    |

**Acquisition sequence: T1 weighted pre contrast**

|                   |                                           |
|-------------------|-------------------------------------------|
| Other parameters: | Phase encoding direction: R/L<br>60 slabs |
|-------------------|-------------------------------------------|

**Acquisition sequence: 2D T2 Flair**

|                                                                   |                                                                   |     |    |
|-------------------------------------------------------------------|-------------------------------------------------------------------|-----|----|
| Type<br>(e.g. FLAIR, DIR, DTI, fMRI)                              | 2D T2 Turbo Flair (Turbo Spin Echo with Inversion Recovery Pulse) |     |    |
| Acquisition time                                                  | 4:31 min to 9:01 min                                              |     |    |
| Orientation                                                       | Axial / Oblique                                                   |     |    |
| Alignment<br>(e.g. anterior commissure/posterior commissure line) | AC-PC                                                             |     |    |
| Voxel size                                                        | 0.98 mm x 0.98 mm x 3mm (slice thickness)                         |     |    |
| TR                                                                | 7559 ms to 9820 ms (*)                                            |     |    |
| TE                                                                | 58 ms to 99 ms (*)                                                |     |    |
| TI                                                                | 2000 ms to 2500 ms(*)                                             |     |    |
| Flip angle                                                        | 100° to 180° (*)                                                  |     |    |
| NEX                                                               | 1                                                                 |     |    |
| Field of view                                                     | AP: 250 mm<br>RL: 187.5 mm to 250 mm (*)                          |     |    |
| Matrix size                                                       | 256                                                               |     |    |
| Parallel imaging                                                  | <table border="1"><tr><td>Yes</td><td>No</td></tr></table>        | Yes | No |
| Yes                                                               | No                                                                |     |    |

| Acquisition sequence: 2D T2 Flair                                                                   |                                                                                                                                           |
|-----------------------------------------------------------------------------------------------------|-------------------------------------------------------------------------------------------------------------------------------------------|
| If used, parallel imaging method:<br>(e.g. SENSE, GRAPPA)                                           | N/A                                                                                                                                       |
| Cardiac gating                                                                                      | Yes No                                                                                                                                    |
| If used, cardiac gating method:<br>(e.g. PPU or ECG)                                                | N/A                                                                                                                                       |
| Contrast enhancement                                                                                | Yes No                                                                                                                                    |
| If used, provide name of contrast agent,<br>dose and timing of scan post-contrast<br>administration | 2D T2 Flair acquired during the 10' delay from the<br>end of the injection to the start of the 3D T1 post<br>contrast (see next sequence) |
| Other parameters:                                                                                   | Phase encoding direction: R/L<br><br>60 slices<br><br>Turbo factor (ETL) = 7 to 12 (*)                                                    |

| Acquisition sequence: T1 weighted Post Contrast                   |                                                           |
|-------------------------------------------------------------------|-----------------------------------------------------------|
| Type<br>(e.g. FLAIR, DIR, DTI, fMRI)                              | 3D spoiled gradient echo<br><br>T1 weighted post contrast |
| Acquisition time                                                  | 4:13 to 9:02                                              |
| Orientation                                                       | Axial / Oblique                                           |
| Alignment<br>(e.g. anterior commissure/poster<br>commissure line) | AC-PC                                                     |
| Voxel size                                                        | 0.98 mm x 0.98 mm x 3mm                                   |
| TR                                                                | 28 or 30 ms (*)                                           |
| TE                                                                | 4 to 11 ms (*)                                            |

| Acquisition sequence: T1 weighted Post Contrast                                                     |                                                                                                                                                                                             |
|-----------------------------------------------------------------------------------------------------|---------------------------------------------------------------------------------------------------------------------------------------------------------------------------------------------|
| TI                                                                                                  | -                                                                                                                                                                                           |
| Flip angle                                                                                          | 27° or 30° (*)                                                                                                                                                                              |
| NEX                                                                                                 | 1                                                                                                                                                                                           |
| Field of view                                                                                       | AP: 250 mm<br>RL: 187.5 to 226.5 mm (*)<br>SI: 180 mm                                                                                                                                       |
| Matrix size                                                                                         | 256                                                                                                                                                                                         |
| Parallel imaging                                                                                    | Yes No                                                                                                                                                                                      |
| If used, parallel imaging method:<br>(e.g. SENSE, GRAPPA)                                           | N/A                                                                                                                                                                                         |
| Cardiac gating                                                                                      | Yes No                                                                                                                                                                                      |
| If used, cardiac gating method:<br>(e.g. PPU or ECG)                                                | N/A                                                                                                                                                                                         |
| Contrast enhancement                                                                                | Yes No                                                                                                                                                                                      |
| If used, provide name of contrast agent,<br>dose and timing of scan post-contrast<br>administration | 10' post contrast dose: according to the weight of<br>the participant (0.1 mmol/kg).<br><br>Contrast agent could be:<br><br>Gadovist, Magnevist, Optimark, Omniscan,<br>Multihance, etc (*) |
| Other parameters:                                                                                   | Phase encoding direction: R/L<br><br>60 slabs                                                                                                                                               |

(\*) Note that when a range or several values are provided, each individual scanner uses a fixed value.



## Image analysis methods and outputs

### **Lesions**

|                                                              |                                                                                                                                                                                                                                                                                                                                                                                                                                                                                                                                                                                                                                           |
|--------------------------------------------------------------|-------------------------------------------------------------------------------------------------------------------------------------------------------------------------------------------------------------------------------------------------------------------------------------------------------------------------------------------------------------------------------------------------------------------------------------------------------------------------------------------------------------------------------------------------------------------------------------------------------------------------------------------|
| Type<br>(e.g. Gd-enhancing, T2-hyperintense, T1-hypointense) | New, enlarging T2 lesion count                                                                                                                                                                                                                                                                                                                                                                                                                                                                                                                                                                                                            |
| Analysis method                                              | <p>Semi-automated with human interface: A New T2 Lesion Count enumerates the number of T2 lesions that are new or enlarging with respect to the timepoint of reference. A New T2 lesion is a T2 lesion that was not present at the reference timepoint. Focal enlargement that is contiguous with an existing T2 lesions is included in the count of "New T2 lesions". Minor lesion growth at the borders of existing lesions is not counted. A new T2 lesion must be at least 3 contiguous voxels in size.</p> <p>The MRI Reader performs a thorough review of all slices and corrects the labels provided by software as necessary.</p> |
| Analysis software                                            | Software developed in-house at NeuroRx                                                                                                                                                                                                                                                                                                                                                                                                                                                                                                                                                                                                    |
| Output measure<br>(e.g. count or volume [ml])                | Count                                                                                                                                                                                                                                                                                                                                                                                                                                                                                                                                                                                                                                     |
| <b>Lesions</b>                                               |                                                                                                                                                                                                                                                                                                                                                                                                                                                                                                                                                                                                                                           |
| Type<br>(e.g. Gd-enhancing, T2-hyperintense, T1-hypointense) | Gd-enhancing lesion count                                                                                                                                                                                                                                                                                                                                                                                                                                                                                                                                                                                                                 |

| Image analysis methods and outputs                                                                                                             |                                                                                                                                                                                                                                                                                                                                                                                                                                                                                                                                                                                                                                                                                                                                                                                                                                                                                                                                                         |
|------------------------------------------------------------------------------------------------------------------------------------------------|---------------------------------------------------------------------------------------------------------------------------------------------------------------------------------------------------------------------------------------------------------------------------------------------------------------------------------------------------------------------------------------------------------------------------------------------------------------------------------------------------------------------------------------------------------------------------------------------------------------------------------------------------------------------------------------------------------------------------------------------------------------------------------------------------------------------------------------------------------------------------------------------------------------------------------------------------------|
| Analysis method                                                                                                                                | <p>A Gadolinium-enhancing lesion is an area of increased signal intensity on a post-contrast T1-weighted MRI that is not due to normal structures. Gadolinium-enhancing lesions must meet the following criteria: The lesion must have at least 3 contiguous voxels that enhance by at least 20% on the post-gadolinium T1-weighted image relative to the pre-gadolinium T1-weighted image. The enhancing voxels on the post gadolinium T1-weighted image must partially co-localize with, or must be adjacent to, a T2-weighted lesion.</p> <p>Two MRI readers independently perform a thorough review of all brain slices and identify the Gadolinium-enhancing lesions. Once both independent reads are performed, saved and locked, the MRI readers meet to perform a Consensus read (which involves the review of all lesions that were labeled to ensure not only that the count is the same but also that the same lesions were identified).</p> |
| Analysis software                                                                                                                              | Manual method                                                                                                                                                                                                                                                                                                                                                                                                                                                                                                                                                                                                                                                                                                                                                                                                                                                                                                                                           |
| Output measure<br>(e.g. count or volume [ml])                                                                                                  | Count                                                                                                                                                                                                                                                                                                                                                                                                                                                                                                                                                                                                                                                                                                                                                                                                                                                                                                                                                   |
| <b>Tissue volumes</b>                                                                                                                          |                                                                                                                                                                                                                                                                                                                                                                                                                                                                                                                                                                                                                                                                                                                                                                                                                                                                                                                                                         |
| Type<br>(e.g. whole brain, grey matter, white matter, spinal cord)                                                                             | N/A                                                                                                                                                                                                                                                                                                                                                                                                                                                                                                                                                                                                                                                                                                                                                                                                                                                                                                                                                     |
| Analysis method                                                                                                                                |                                                                                                                                                                                                                                                                                                                                                                                                                                                                                                                                                                                                                                                                                                                                                                                                                                                                                                                                                         |
| Analysis software                                                                                                                              |                                                                                                                                                                                                                                                                                                                                                                                                                                                                                                                                                                                                                                                                                                                                                                                                                                                                                                                                                         |
| Output measure<br>(e.g. absolute tissue volume in ml, tissue volume as a fraction of intracranial volume, percentage change in tissue volumes) |                                                                                                                                                                                                                                                                                                                                                                                                                                                                                                                                                                                                                                                                                                                                                                                                                                                                                                                                                         |
| <b>Tissue measures (e.g. MTR, DTI, T1-RT, T2-RT, T2*, T2', <sup>1</sup>H-MRS, perfusion, Na)</b>                                               |                                                                                                                                                                                                                                                                                                                                                                                                                                                                                                                                                                                                                                                                                                                                                                                                                                                                                                                                                         |
| Type<br>(e.g. whole brain, grey matter, white matter, spinal cord, normal-appearing grey matter or white matter)                               | N/A                                                                                                                                                                                                                                                                                                                                                                                                                                                                                                                                                                                                                                                                                                                                                                                                                                                                                                                                                     |
| Analysis method                                                                                                                                |                                                                                                                                                                                                                                                                                                                                                                                                                                                                                                                                                                                                                                                                                                                                                                                                                                                                                                                                                         |

| <b>Image analysis methods and outputs</b>                                                                        |     |
|------------------------------------------------------------------------------------------------------------------|-----|
| Analysis software                                                                                                |     |
| Output measure                                                                                                   |     |
| <b><i>Other MRI measures (e.g. functional MRI)</i></b>                                                           |     |
| Type<br>(e.g. whole brain, grey matter, white matter, spinal cord, normal-appearing grey matter or white matter) | N/A |
| Analysis method                                                                                                  |     |
| Analysis software                                                                                                |     |
| Output measure                                                                                                   |     |

**Other analysis details:**
